# Supplementary material for: Glass transition of aqueous solutions involving annealing-induced ice recrystallization resolves liquid-liquid transition puzzle of water
Source: PubMed Central journal article supplement (PMC4621610; doi:10.1038/srep15714), 2015-10-27
Supplement: srep15714-s1.pdf [file srep15714-s1.pdf]

## SUPPLEMENTARY INFORMATION

### **Glass transition of aqueous solutions involving annealing-induced ice recrystallization resolves liquid-liquid transition puzzle of water**

Li-Shan Zhao<sup>1,2</sup>, Ze-Xian Cao<sup>1</sup> & Qiang Wang<sup>1</sup>

<sup>1</sup>Beijing National Laboratory for Condensed Matter Physics, Institute of Physics, Chinese Academy of  
Sciences, Beijing 100190, China

<sup>2</sup>Department of Physics, University of Science and Technology Beijing, Beijing 100083, China

Correspondence and requests for materials should be addressed to

Q.W (qwang@iphy.ac.cn) or

Z.-X.Cao (zxcao@iphy.ac.cn)

This supplementary information includes 4 figures.

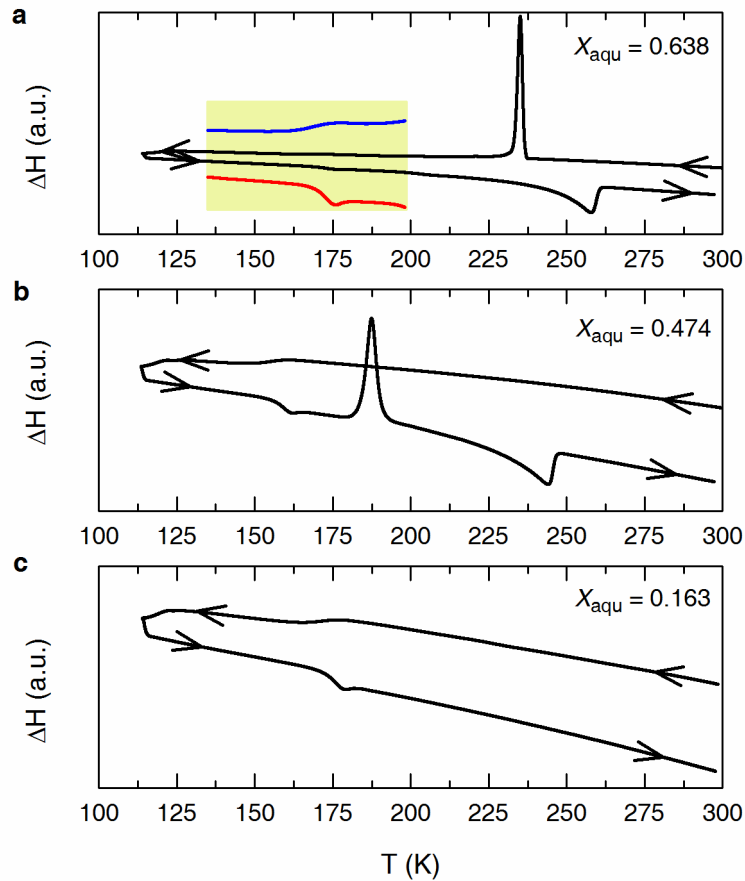

Supplementary Figure 1. DSC thermograms for aqueous glycerol solutions with a mass fraction of water of  $X_{\text{aqu}} = 0.638$  (a), 0.474 (b), and 0.163 (c), falling respectively within Zones I, II, and III as specified in Fig. 1a. For water-rich solutions in zone I as illustrated with that of  $X_{\text{aqu}} = 0.638$  (a), primary ice precipitates first in the cooling process as revealed by a pronounced exothermal peak. The subsequent vitrification process involves only the freeze-concentrated phase. On the heating process, devitrification occurs prior to the melting of primary ice which is revealed by an endothermal peak. For solutions in zone II as illustrated with that of  $X_{\text{aqu}} = 0.474$  (b), the sample vitrifies totally in the cooling process, and devitrification in the heating process is followed by the recrystallization of ice as revealed by a pronounced exothermal peak. This is particularly the case for those solutions with a  $X_{\text{aqu}}$  approaching  $X_{\text{aqu}}^{\text{cr}}$ . For solutions in zone III as illustrated with that of  $X_{\text{aqu}} = 0.163$  (c), only vitrification and devitrification processes are observed. Arrows indicate the direction of temperature scanning. Scanning rate:  $20 \text{ K min}^{-1}$ .

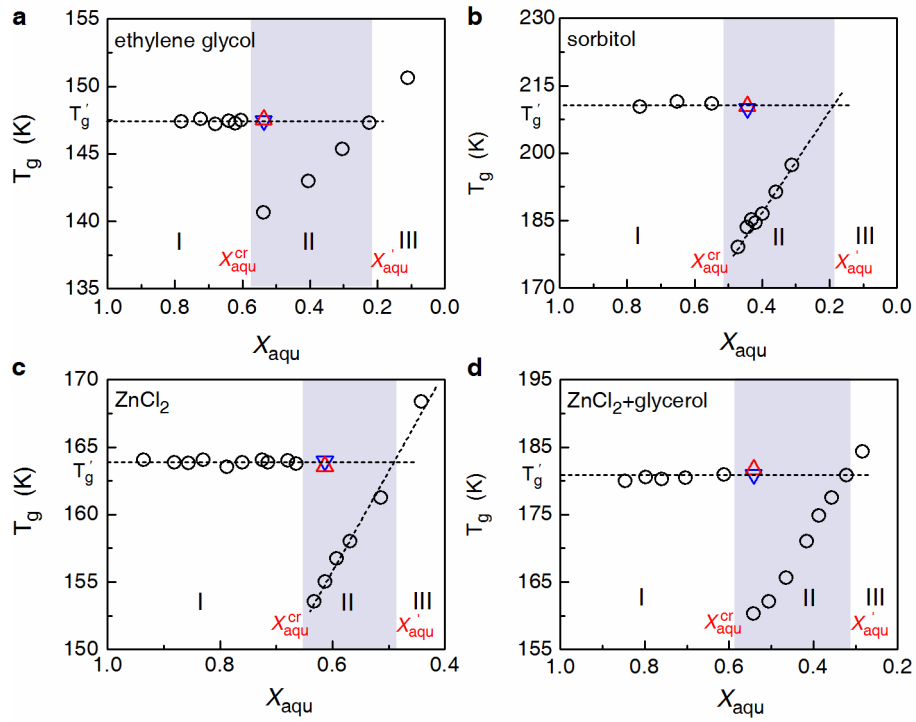

Supplementary Figure 2. Glass transition temperature versus mass fraction of water for aqueous solutions of (a) ethylene glycol, (b) sorbitol, (c)  $\text{ZnCl}_2$ , and (d)  $\text{ZnCl}_2$  + glycerol (molar ratio 1:1). Black circles:  $T_g$  measured in the conventional one-round cooling/heating process, i.e., protocol 1 adopted as in Supplementary Fig.1 and in Fig. 1c (black solid line); Blue and red triangles:  $T_g$  of the freeze-concentrated phase actualized by the cooling/heating process specified in protocol 3 (orange line in Fig. 1c) and protocol 4 (Fig. 1d), respectively. Here,  $T_g' = 147$  K,  $X_{\text{aqu}}^{\text{cr}} = 0.575$ , and  $X_{\text{aqu}}^{\text{'}} = 0.216$  for ethylene glycol solutions;  $T_g' = 211$  K,  $X_{\text{aqu}}^{\text{cr}} = 0.514$ , and  $X_{\text{aqu}}^{\text{'}} = 0.188$  for sorbitol solutions;  $T_g' = 164$  K,  $X_{\text{aqu}}^{\text{cr}} = 0.652$ , and  $X_{\text{aqu}}^{\text{'}} = 0.488$  for  $\text{ZnCl}_2$  solutions; and  $T_g' = 181$  K,  $X_{\text{aqu}}^{\text{cr}} = 0.586$ ,  $X_{\text{aqu}}^{\text{'}} = 0.315$  for  $\text{ZnCl}_2$  + glycerol (molar ratio 1:1) solutions.

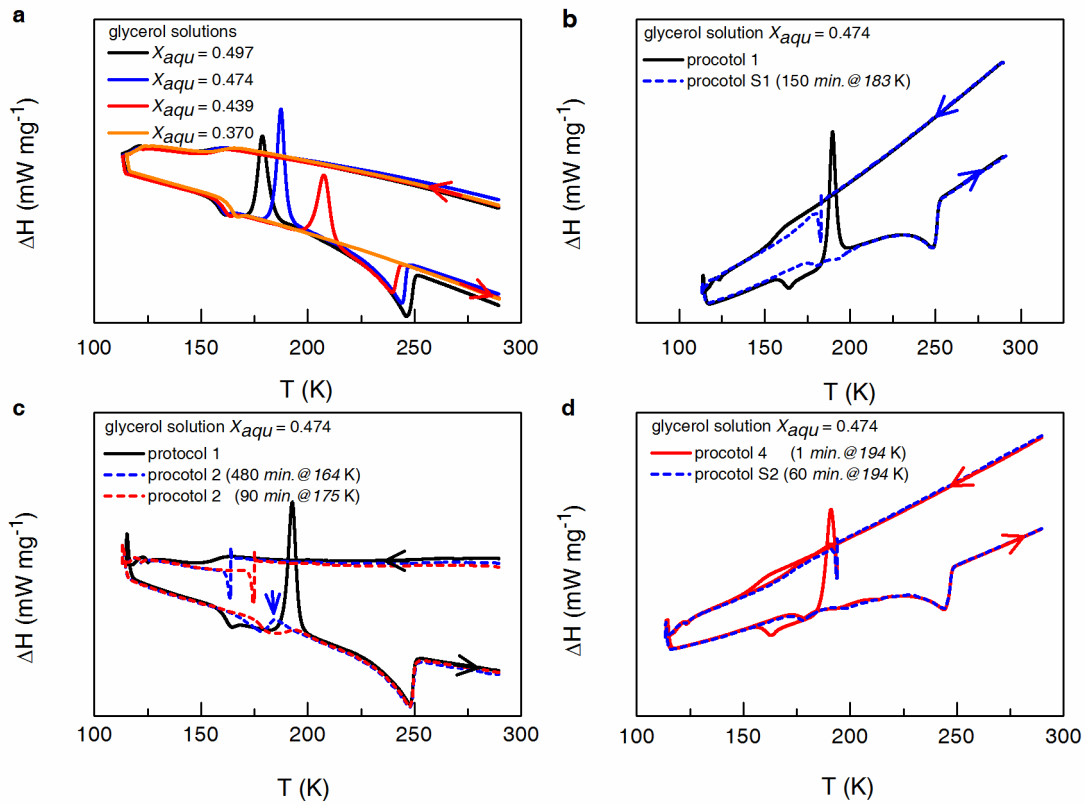

Supplementary Figure 3. Different cooling/heating protocols that effectively evoke ice recrystallization. **(a)** DSC thermograms under protocol 1 for aqueous glycerol solutions with  $X_{\text{aqu}} = 0.497, 0.474, 0.439$  and  $0.370$ , respectively. The onset temperature of ice recrystallization,  $T_{\text{onset}}$ , shifts steadily towards higher temperature with increasing concentrations for solutions falling within Zone II. **(b)** DSC thermograms for the aqueous glycerol solution with  $X_{\text{aqu}} = 0.474$  under other annealing treatments. Blue line for protocol S1: the cooling process was interrupted at  $T_{\text{a}} = 183 \text{ K}$  ( $> T_{\text{onset}} = 180 \text{ K}$ ), and maintained for 150 min. After that, the sample was cooled down to  $113 \text{ K}$  and then heated up to room temperature. **(c)** DSC thermograms for the aqueous glycerol solution with  $X_{\text{aqu}} = 0.474$  under different annealing treatments. The degree of ice recrystallization can be evaluated by the area of the exothermal peak on the heating curve and the glass transition temperature of the freeze-concentrated phase. **(d)** DSC thermograms for aqueous glycerol solution with  $X_{\text{aqu}} = 0.474$  under cooling/heating protocol protocol 4 and S2. Red curve (protocol 4): the heating process is interrupted at  $194 \text{ K}$ , where the recrystallization of ice has been brought to the end, and maintained there for 1 min. After that, the sample was again cooled down to  $113 \text{ K}$

and then heated up to room temperature; Blue curve (protocol S2): the cooling process was interrupted at 194 K ( $T_a > T_{\text{onset}}$ ) and maintained there for 60 min. After that, the sample was further cooled down to 113 K and then heated up to room temperature. Obviously, both procedures result in ice recrystallization and a shifted glass-liquid transition temperature. In other words, a vitrification/devitrification process can strongly promote ice recrystallization.

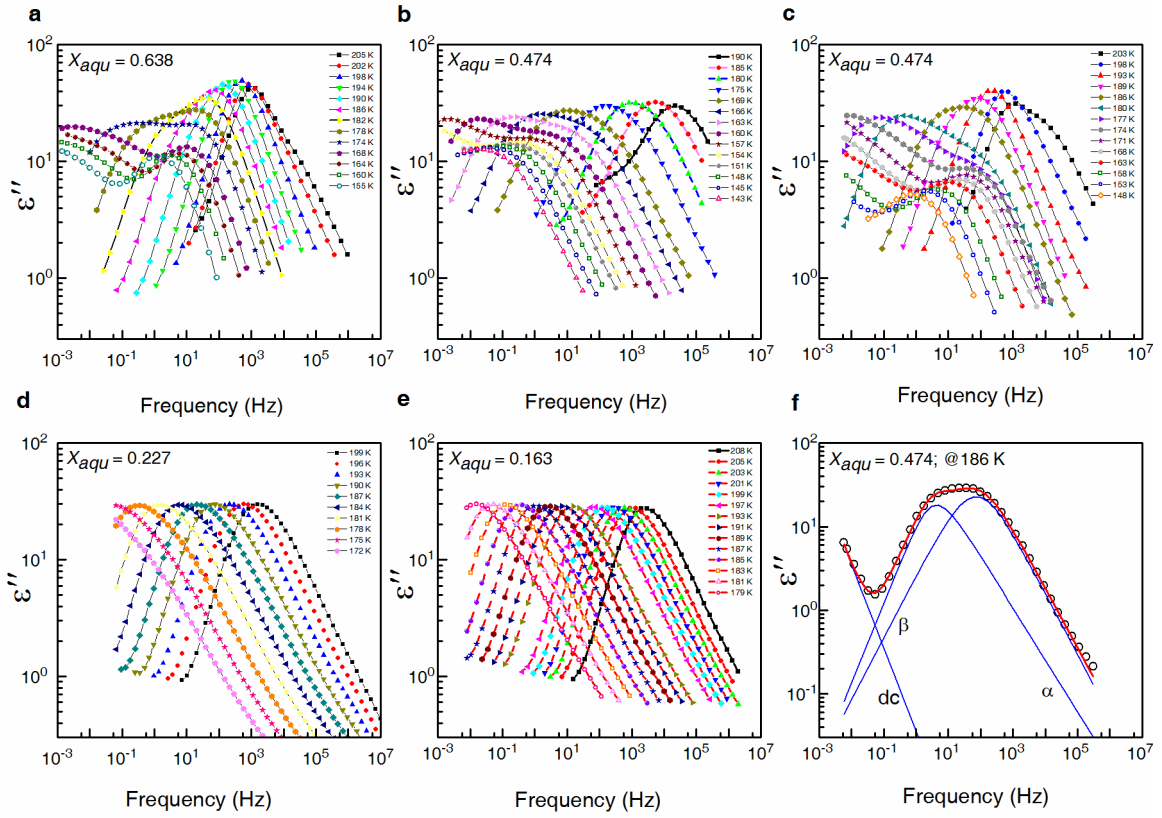

Supplementary Figure 4. Dielectric loss spectra for aqueous glycerol solutions. **(a)-(e)** Imaginary part of permittivity,  $\epsilon''$ , versus temperature for aqueous glycerol solutions with an  $X_{\text{aqu}}$  of **(a)** 0.638, **(b)** and **(c)** 0.474, **(d)** 0.227, and **(e)** 0.163. With increasing temperature the main peak shifts steadily towards higher frequency. In **(a)**,  $X_{\text{aqu}} = 0.638 > X_{\text{aqu}}^{\text{cr}} = 0.526$ , spectra were measured during sample heating from 140 K up to room temperature. At 140 K, the sample comprises a mixture of crystallized ice and vitrified freeze-concentrated phase with  $X_{\text{aqu}} = X'_{\text{aqu}} = 0.227$ . For each targeted temperature point, spectral collection ran automatically when the sample temperature is within 0.3 K from the targeted temperature value. In **(b)**, before measurement the sample was cooled from room temperature down to each targeted temperature point. This procedure can effectively prevent ice recrystallization, thus the measured spectra only refer to the supercooled liquid solution. In **(c)**, the sample with  $X_{\text{aqu}} = 0.474$  was first cooled down to 183 K and maintained there for 150 min., and then cooled down to 140 K. As the case for solution with  $X_{\text{aqu}} = 0.638$ , the sample with  $X_{\text{aqu}} = 0.474$  at 140 K comprises a mixture of recrystallized ice and vitrified freeze-concentrated phase with  $X_{\text{aqu}} = X'_{\text{aqu}} = 0.227$ . The spectra were obtained during heating

process. In **(d)** and **(e)** where the solutions with  $X_{\text{aqu}} = 0.227$  and  $0.163$  fall within zone III, the spectra were measured during heating process from 140 K up to room temperature. **(f)** Fitting of dielectric loss spectra with the Havriliak-Negami function, as exemplified with the data measured on the sample with  $X_{\text{aqu}} = 0.474$  at 186 K, where 'dc' denotes the dc conductivity, ' $\alpha$ ' and ' $\beta$ ' refer to the  $\alpha$  process and the Johari-Goldstein (or slow  $\beta$ ) process, respectively. Here  $\tau_{\alpha}=53.27$  ms;  $\tau_{\beta}= 2.29$  ms when both parameters are allowed to change in the fitting process. In order to acquire a sense of the indeterminacy with the fitting parameters, the intervals for  $\tau_{\alpha}$  and  $\tau_{\beta}$ , in which that when one parameter is fixed, a satisfactory fitting can still be made by varying the other, are given. For  $\tau_{\alpha}$ , it is 37.42~75.47 ms, while for  $\tau_{\beta}$  this is 1.64~3.25 ms.
